# Supplementary material for: Microenvironmental topographic cues influence migration dynamics of nasopharyngeal carcinoma cells from tumour spheroids
Source: Royal Society of Chemistry journal article supplement (doi:10.1039/d0ra03740k), 2020-01-01
Supplement: d0ra03740k1.pdf [file d0ra03740k1.pdf]

## Supporting Information

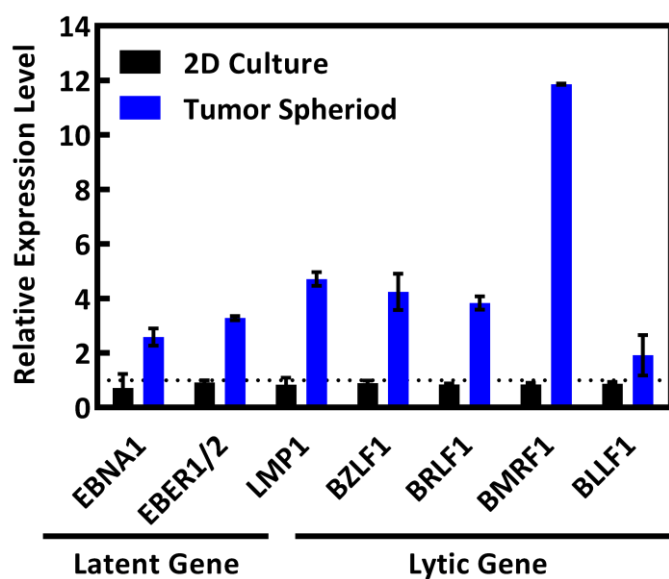

**Supplementary Figure S1.** Relative expression levels of EBV-encoded genes in NPC43 spheroids, relative to the corresponding expression levels of these genes in 2D cultured NPC43 cells.
